# Supplementary material for: Characterizing Bacillus globigii as a Bacillus anthracis surrogate for wastewater treatment studies and bioaerosol emissions
Source: Royal Society of Chemistry journal article supplement (doi:10.1039/d3ew00524k), 2023-01-01
Supplement: d3ew00524k2.pdf [file d3ew00524k2.pdf]

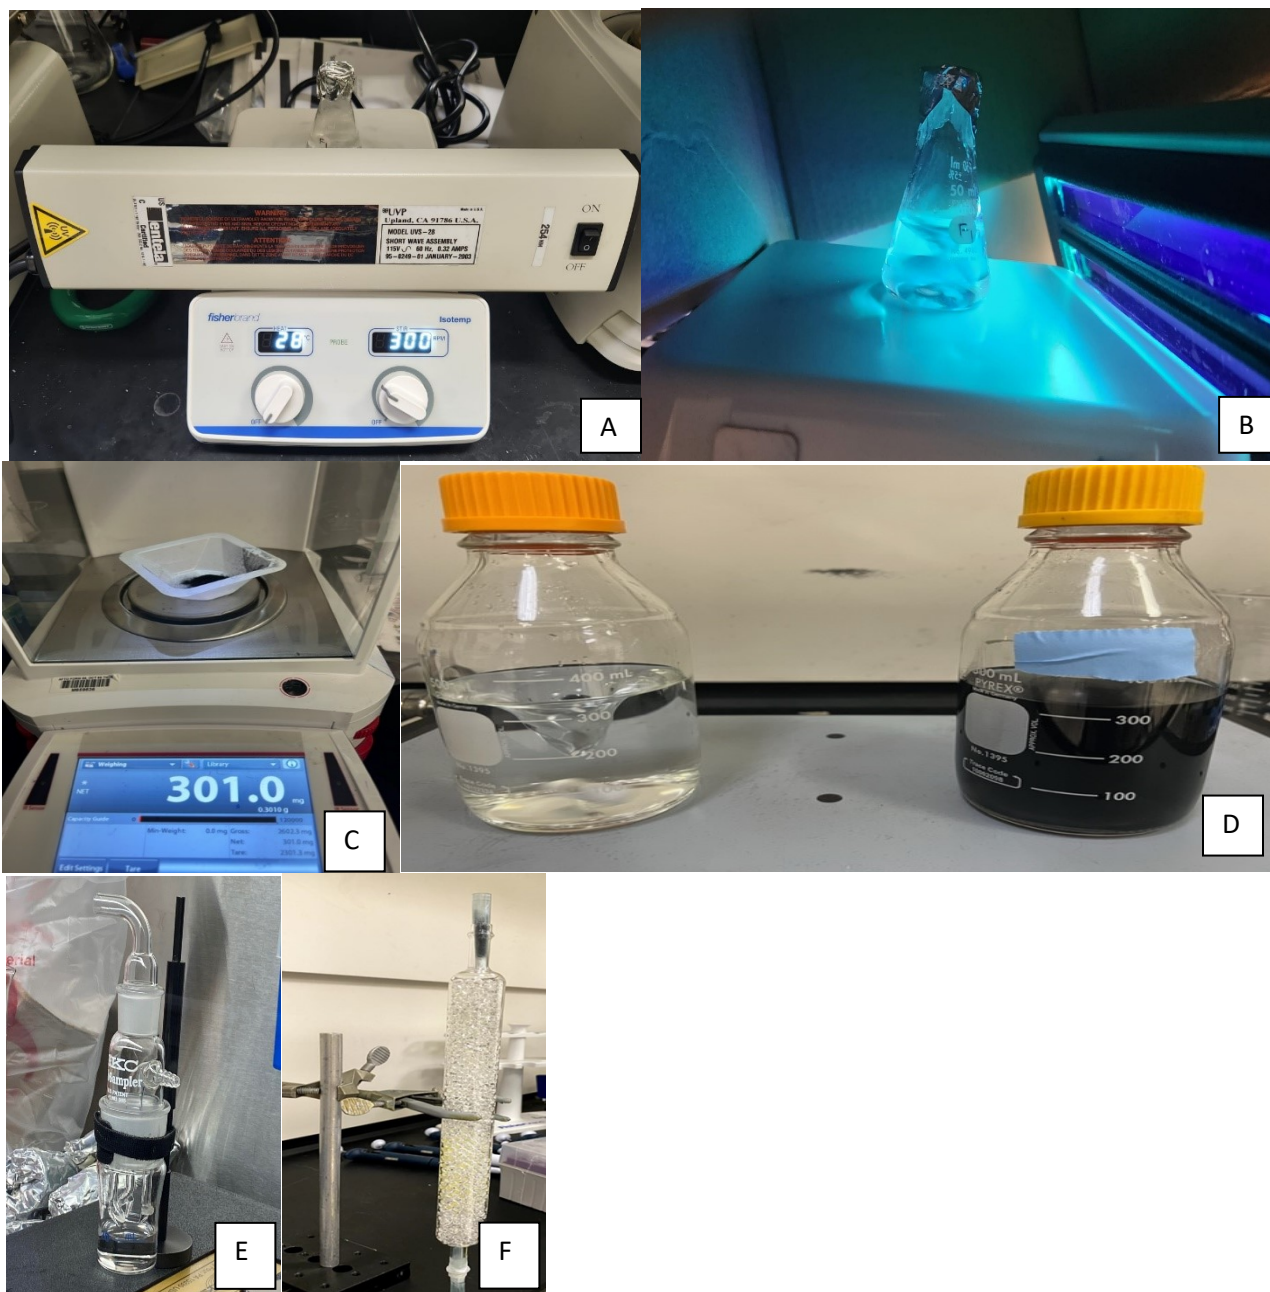

Figure A1. Panel A: Mercury lamp and stir plate. Panel B: Inactivation experimental set-up with flask placed in front of 8 watt, 254 nm low pressure mercury lamp (the flask and lamp are covered). Panel C: PAC was used for each experiment. Panel D: Adsorption experimental set-up with PAC. Panel E: SKC Biosampler used during bioaerosol experiments. Panel F: Glass bead column used for air filtration during bioaerosol experiments.
