# Supplementary material for: Characterizing Bacillus globigii as a Bacillus anthracis surrogate for wastewater treatment studies and bioaerosol emissions
Source: Royal Society of Chemistry journal article supplement (doi:10.1039/d3ew00524k), 2023-01-01
Supplement: d3ew00524k3.pdf [file d3ew00524k3.pdf]

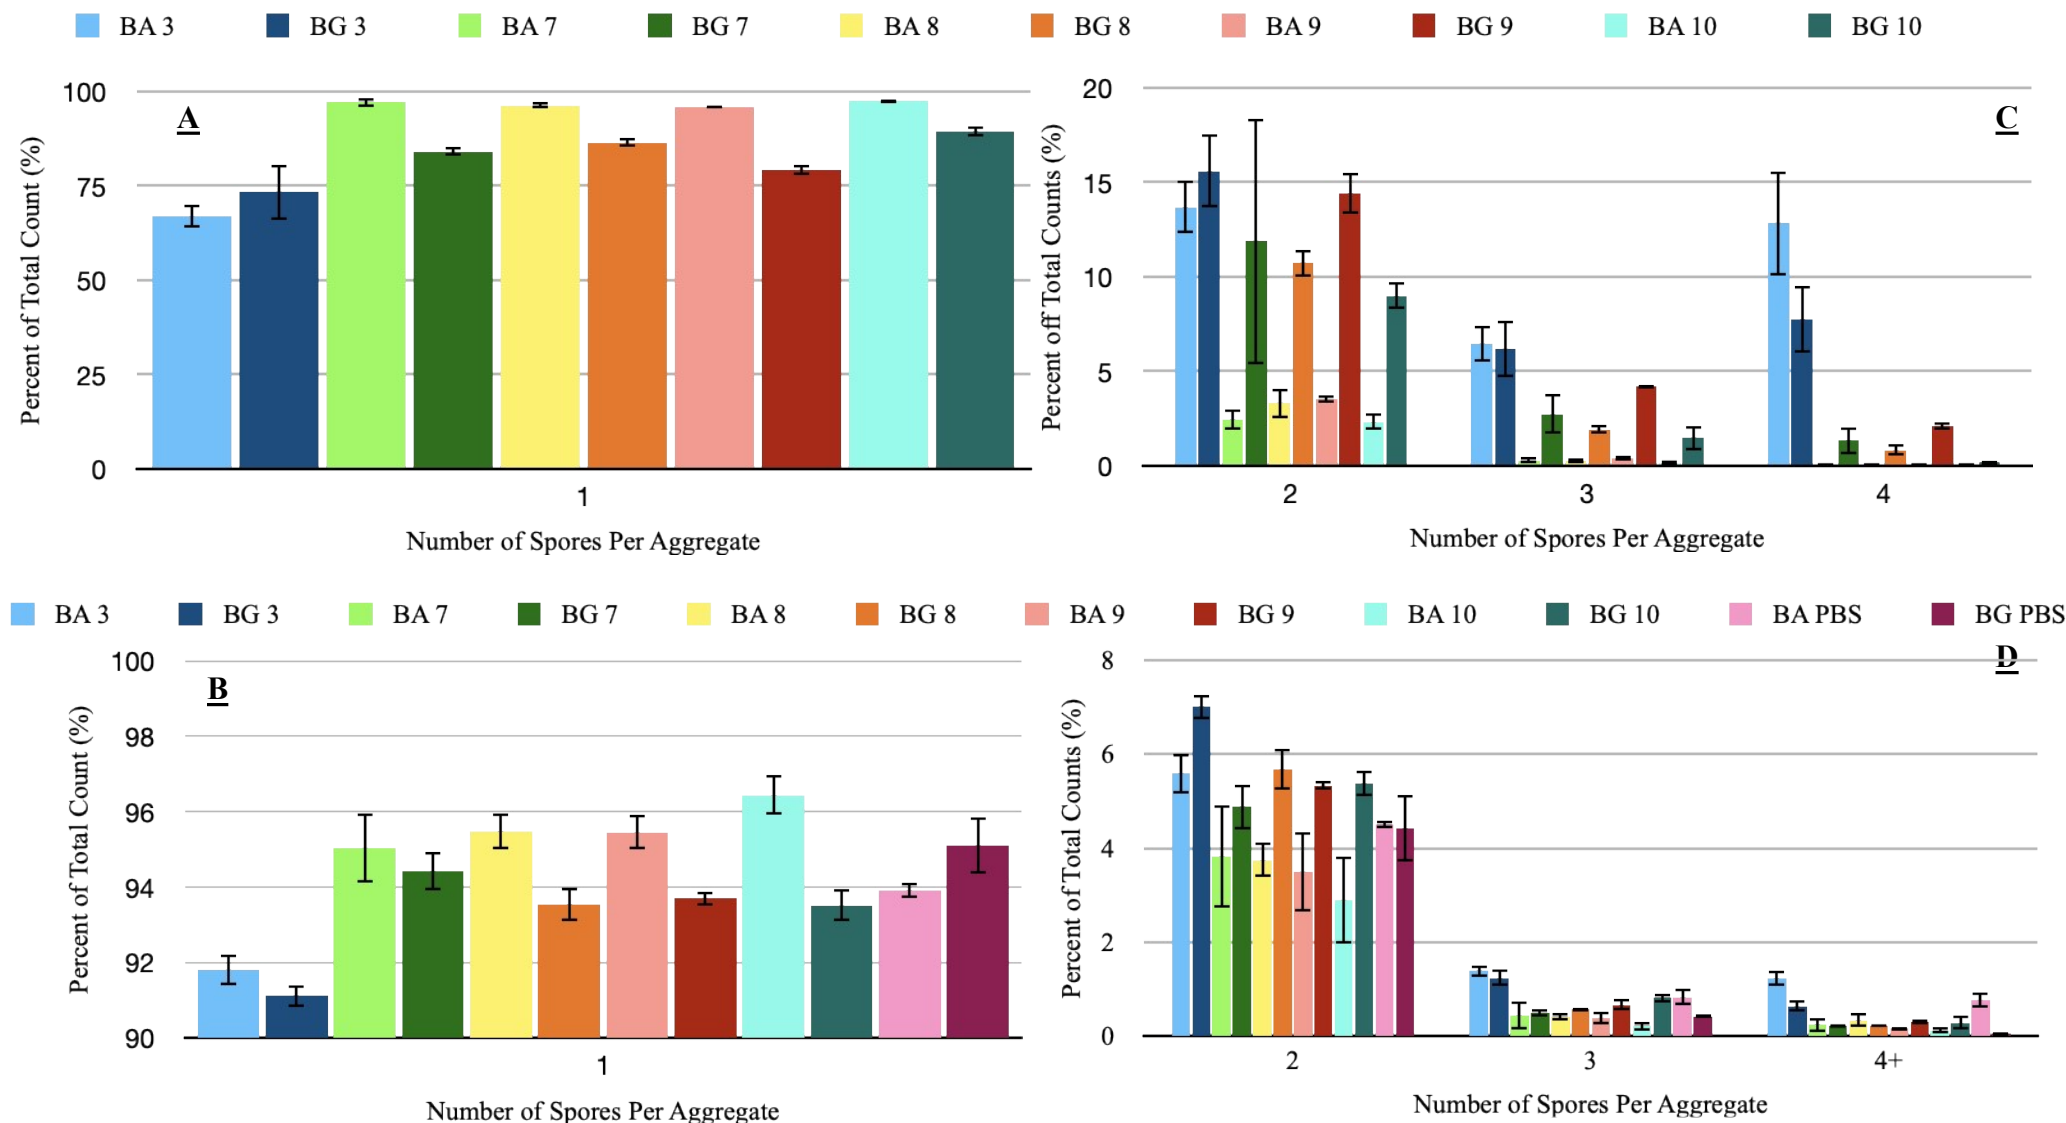

Figure A2: Percentages of isolated spores in DI water (A) and 0.15M NaCl solutions (B). Aggregates of 2 or more in DI water (C) and 0.15M NaCl solutions (D).
