# Supplementary material for: Characterizing Bacillus globigii as a Bacillus anthracis surrogate for wastewater treatment studies and bioaerosol emissions
Source: Royal Society of Chemistry journal article supplement (doi:10.1039/d3ew00524k), 2023-01-01
Supplement: d3ew00524k4.pdf [file d3ew00524k4.pdf]

Table A1. Microscopic observations before and after inactivation. Spores were plated at  $1 \times 10^4$  CFU/mL on nutrient agar. Images were taken 24 hours after incubating. Each square is 3mm x 3mm.

|                 | Before inactivation with UV light                                                   | After inactivation with UV light                                                     |
|-----------------|-------------------------------------------------------------------------------------|--------------------------------------------------------------------------------------|
| BAS in PBS      |    |    |
| BAS in DI water |   |   |
| BG in PBS       |  |  |

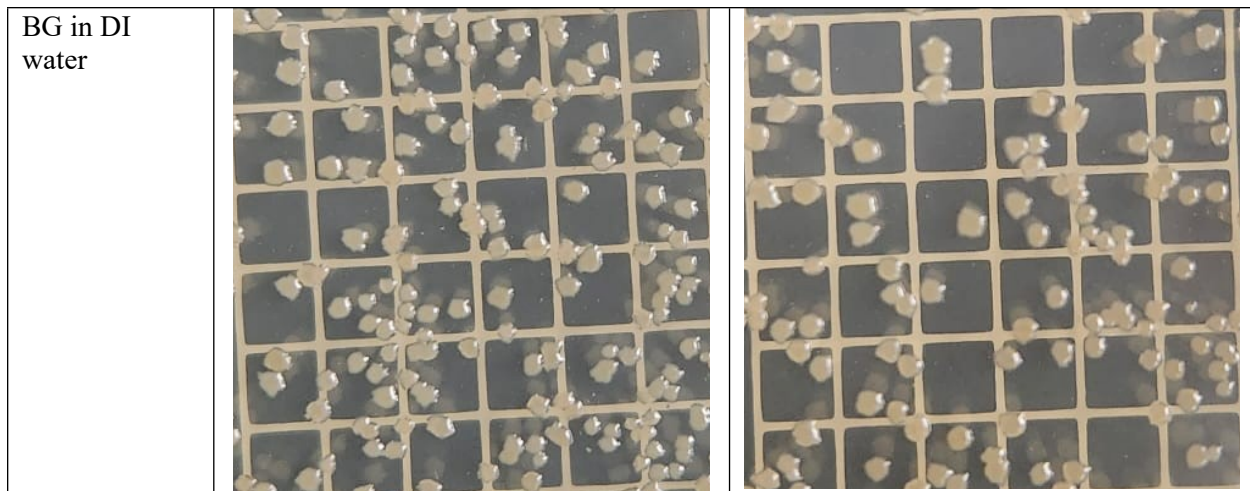

|                | <b>BA in PBS</b>                                                        | <b>BA in DI water</b>                                                   | <b>BG in PBS</b>                                                                        | <b>BG in DI water</b>                  |
|----------------|-------------------------------------------------------------------------|-------------------------------------------------------------------------|-----------------------------------------------------------------------------------------|----------------------------------------|
| <b>Color</b>   | White, opaque                                                           | White, opaque                                                           | Orange or white, opaque                                                                 | Orange, opaque                         |
| <b>Size</b>    | All relatively large (>1mm) colonies.                                   | All relatively large (>1mm) colonies.                                   | All relatively small (<1mm) colonies aside from some medium ( $\leq$ 1mm) colonies.     | All relatively small (< 1mm) colonies. |
| <b>Surface</b> | Smooth, glistening, and flat                                            | Smooth, glistening, and flat                                            | Orange colonies: smooth, glistening, and flat<br>White colonies: smooth, dull, and flat | Smooth, glistening, and flat           |
| <b>Shape</b>   | Irregular form and margins, often comma-shaped, and sometimes circular. | Irregular form and margins, often comma-shaped, and sometimes circular. | Irregular form and margins.                                                             | Irregular form and margins.            |
